# Supplementary material for: A Design of Experiment Approach for Ionic Liquid-Based Extraction of Toxic Components-Minimized Essential Oil from Myristica fragrans Houtt. Fruits
Source: PubMed Central journal article supplement (PMC6278261; doi:10.3390/molecules23112817), 2018-10-30
Supplement: molecules-23-02817-s001.pdf [file molecules-23-02817-s001.pdf]

# **A Design of Experiment approach for Ionic Liquid-based Extraction of Toxic Components-Minimized Essential Oil from *Myristica fragrans* Houtt. Fruits.**

**Daniela Lanari<sup>†</sup>, Andrea Neri and Maria Carla Marcotullio<sup>†,\*</sup>**

Dipartimento di Scienze Farmaceutiche, via del Liceo, 1- Università degli Studi, 06123 Perugia, Italy;  
[daniela.lanari@unipg.it](mailto:daniela.lanari@unipg.it); [neriandrea1990@gmail.com](mailto:neriandrea1990@gmail.com); [mariacarla.marcotullio@unipg.it](mailto:mariacarla.marcotullio@unipg.it)

\* Correspondence: [mariacarla.marcotullio@unipg.it](mailto:mariacarla.marcotullio@unipg.it); Tel.: +39-075-5855100

<sup>†</sup>These authors contributed equally to this work

<sup>‡</sup>Dedicated to Professor M. Curini on the occasion of his 70th birthday

## Summary

|                                                                                                                                            |    |
|--------------------------------------------------------------------------------------------------------------------------------------------|----|
| Notes to the Tables.....                                                                                                                   | 1  |
| Table S1. Composition of the essential oils of <i>Myristica fragrans</i> obtained by using NaCl 0.5M. ....                                 | 2  |
| Table S2. Composition of the essential oils of <i>Myristica fragrans</i> obtained by common hydrodistillation and by using 0.5M IL 5. .... | 3  |
| Table S3. Composition of the essential oils of <i>Myristica fragrans</i> obtained by using IL 1.....                                       | 5  |
| Table S4. Composition of the essential oils of <i>Myristica fragrans</i> obtained by using IL 2.....                                       | 7  |
| Table S5. Composition of the essential oils of <i>Myristica fragrans</i> obtained by using IL 3.....                                       | 8  |
| Table S6. Composition of the essential oils of <i>Myristica fragrans</i> obtained by using IL 4.....                                       | 9  |
| Table S7. Composition of the essential oils of <i>Myristica fragrans</i> obtained by using IL 5.....                                       | 10 |
| Table S8. Composition of the essential oils of <i>Myristica fragrans</i> obtained by using IL 6.....                                       | 11 |
| Table S9. <i>P</i> -values for all the coefficients.....                                                                                   | 12 |

**Notes to the Tables**

<sup>a</sup> Percentage obtained by FID peak-area normalization. Values are presented as the mean of two extractions;

<sup>b</sup> Components are listed in order of their elution from a DB-5MS column;

<sup>c</sup> Identification: by comparison of the mass spectrum with those of the computer WILEY275 library (99% matching);

<sup>d</sup>NI: not identified.

**Table S1.** Composition of the essential oils of *Myristica fragrans* obtained by using NaCl 0.5M.

| <b>Component<sup>a,b</sup></b>         | <b>%</b>     |
|----------------------------------------|--------------|
| $\alpha$ -Thujene                      | 0.20         |
| $\alpha$ -Pinene                       | 3.31         |
| Sabinene                               | 9.03         |
| $\beta$ -Pinene                        | 5.08         |
| Myrcene                                | 0.72         |
| $\alpha$ -Phellandrene                 | 0.47         |
| $\alpha$ -Terpinene                    | 1.03         |
| <i>p</i> -Cymene                       | 0.96         |
| Limonene                               | 3.54         |
| $\gamma$ -Terpinene                    | 1.94         |
| <i>cis</i> -Sabinene hydrate           | 0.23         |
| Terpinolene                            | 0.62         |
| Linalool                               | 0.48         |
| <i>p</i> -Menth-2-en-1-ol <i>cis</i>   | 0.36         |
| <i>p</i> -Menth-2-en-1-ol <i>trans</i> | 0.23         |
| Terpinen-4-ol                          | 8.25         |
| $\alpha$ -Terpineol                    | 0.95         |
| <i>trans</i> -Piperitol                | 0.15         |
| Bornyl acetate                         | 0.13         |
| Safrole                                | 1.82         |
| $\alpha$ -Cubebene                     | 0.10         |
| Eugenol                                | 2.70         |
| $\alpha$ -Copaene                      | 0.57         |
| Methyl eugenolo                        | 3.27         |
| $\beta$ -Caryophyllene                 | 0.20         |
| Isoeugenol                             | 0.44         |
| Methyl isoeugenol                      | 0.79         |
| Myristicin                             | 50.48        |
| Elemicin                               | 1.17         |
| NI <sup>d</sup>                        | 0.36         |
| Myristic acid                          |              |
| NI <sup>d</sup>                        |              |
| <b>Total (%)</b>                       | <b>99.56</b> |
| <b>Total identified</b>                | <b>99.21</b> |
| <b>Monoterpene hydrocar.</b>           | <b>27.12</b> |
| <b>Oxygenated monoterpenes</b>         | <b>10.55</b> |
| <b>Sesquiterpene hydrocar.</b>         | <b>0.8/8</b> |
| <b>Phenols</b>                         | <b>60.66</b> |
| <b>Acids</b>                           | <b>0</b>     |

**Table S2.** Composition of the essential oils of *Myristica fragrans* obtained by common hydrodistillation and by using 0.5M IL 5.

| Component                              | H <sub>2</sub> O (%) <sup>a,b</sup> | IL 5 (%) <sup>a,b</sup> | RI <sup>c,d</sup> | RI Lit. <sup>e</sup> |
|----------------------------------------|-------------------------------------|-------------------------|-------------------|----------------------|
| $\alpha$ -Thujene                      |                                     | 0.11±0.10               | 925               | 930                  |
| $\alpha$ -Pinene                       | 1.09±0.06                           | 1.18±0.08               | 933               | 939                  |
| Sabinene                               | 2.23±0.11                           | 1.42±0.09               | 975               | 975                  |
| $\beta$ -Pinene                        | 1.62±0.08                           | 1.65±0.12               | 978               | 979                  |
| Myrcene                                |                                     | 0.37±0.07               | 989               | 990                  |
| $\alpha$ -Phellandrene                 | 0.10±0.12                           | 0.40±0.10               | 1004              | 1002                 |
| $\alpha$ -Terpinene                    | 0.29±0.01                           | 3.22±0.04               | 1015              | 1017                 |
| <i>p</i> -Cymene                       |                                     | 1.04±0.012              | 1023              | 1024                 |
| Limonene                               | 0.97±0.08                           | 3.11±0.07               | 1030              | 1029                 |
| $\gamma$ -Terpinene                    | 0.57±0.07                           | 5.01±0.05               | 1059              | 1059                 |
| <i>cis</i> -Sabinene hydrate           | 0.30±0.02                           | 1.77±0.08               | 1070              | 1070                 |
| Terpinolene                            | 0.27±0.05                           | 0.14±0.07               | 1084              | 1088                 |
| Linalool                               | 0.47±0.10                           |                         | 1099              | 1090                 |
| <i>p</i> -Menth-2-en-1-ol <i>cis</i>   | 0.44±0.11                           |                         | 1120              | 1121                 |
| <i>p</i> -Menth-2-en-1-ol <i>trans</i> | 0.28±0.08                           |                         | 1140              | 1140                 |
| Terpinen-4-ol                          | 10.03±0.01                          | 19.57±0.14              | 1182              | 1177                 |
| $\alpha$ -Terpineol                    | 1.45±0.16                           | 4.91±0.12               | 1190              | 1188                 |
| <i>trans</i> -Piperitol                | 0.32±0.08                           |                         | 1214              | 1207                 |
| Bornyl acetate                         |                                     | 2.44±0.08               | 1285              | 1288                 |
| Safrole                                | 2.90±0.11                           | 1.66±0.09               | 1289              | 1287                 |
| $\alpha$ -Cubebene                     | 0.94±0.08                           | 0.17±0.06               | 1344              | 1348                 |
| Eugenol                                | 2.16±0.05                           | 0.91±0.07               | 1356              | 1359                 |
| $\alpha$ -Copaene                      | 0.62±0.10                           | 0.30±0.03               | 1379              | 1376                 |
| Methyl eugenolo                        | 7.15±0.16                           | 3.51±0.12               | 1405              | 1403                 |
| $\beta$ -Caryophyllene                 | 0.33±0.15                           | 1.37±0.08               | 1420              | 1417                 |
| Isoeugenol                             | 0.24±0.14                           | 0.20±0.09               | 1459              | 1447                 |
| Methyl isoeugenol                      | 1.08±0.05                           | 0.53±0.05               | 1504              | 1491                 |
| Myristicin                             | 57.91±0.09                          | 40.20±0.05              | 1522              | 1517                 |
| Elemicin                               | 2.88±0.26                           | 1.60±0.15               | 1556              | 1555                 |
| NI <sup>f</sup>                        | 1.16±0.16                           | 0.37±0.18               | 1647              |                      |
| Myristic acid                          | 0.89±0.40                           | 2.00±0.25               | 1774              |                      |
| NI <sup>f</sup>                        | 0.87±0.21                           | 0.55±0.09               | 1840              |                      |
| <b>Total (%)</b>                       | <b>99.57</b>                        | <b>99.68</b>            |                   |                      |
| <b>Total identified</b>                | <b>97.54</b>                        | <b>98.76</b>            |                   |                      |
| <b>Monoterpene hydrocarbons</b>        | <b>7.44</b>                         | <b>19.40</b>            |                   |                      |
| <b>Oxygenated monoterpenes</b>         | <b>13.00</b>                        | <b>26.92</b>            |                   |                      |

|                      |              |              |
|----------------------|--------------|--------------|
| <b>Sesquiterpene</b> | <b>1.89</b>  | <b>1.84</b>  |
| <b>hydrocarbons</b>  |              |              |
| <b>Phenols</b>       | <b>74.32</b> | <b>48.61</b> |
| <b>Acids</b>         | <b>0.89</b>  | <b>2.00</b>  |

---

**Table S3.** Composition of the essential oils of *Myristica fragrans* obtained by using IL 1.<sup>a</sup>

| <b>Component<sup>b,c</sup></b>         | <b>Exp. n° 8</b> | <b>Exp. n° 9</b> | <b>Exp. n° 10</b> |
|----------------------------------------|------------------|------------------|-------------------|
| $\alpha$ -Thujene                      | 0.40             | 0.38             | 0.40              |
| $\alpha$ -Pinene                       | 4.17             | 2.55             | 2.08              |
| Sabinene                               | 10.65            | 8.32             | 7.61              |
| $\beta$ -Pinene                        | 4.08             | 3.24             | 2.75              |
| Myrcene                                | 0.42             | 0.12             | 0.20              |
| $\alpha$ -Phellandrene                 | 0.13             | 0.29             | 0.20              |
| $\alpha$ -Terpinene                    | 0.15             | 0.12             | 0.10              |
| <i>p</i> -Cymene                       | 0.46             | 0.46             | 0.34              |
| Limonene                               | 0.48             | 0.58             | 0.43              |
| $\gamma$ -Terpinene                    | 1.46             | 0.67             | 0.95              |
| <i>cis</i> -Sabinene hydrate           | 0.39             | 0.38             | 0.38              |
| Terpinolene                            | 0.71             | 0.89             | 0.71              |
| Linalool                               | 0.87             | 0.26             | 0.60              |
| <i>p</i> -Menth-2-en-1-ol <i>cis</i>   | 0.84             | 0.17             | 0.20              |
| <i>p</i> -Menth-2-en-1-ol <i>trans</i> | 0.13             | 0.11             | 0.14              |
| Terpinen-4-ol                          | 3.82             | 3.42             | 3.66              |
| $\alpha$ -Terpineol                    | 0.50             | 0.61             | 0.64              |
| <i>trans</i> -Piperitol                |                  |                  |                   |
| Bornyl acetate                         |                  |                  |                   |
| Safrole                                | 2.31             | 2.09             | 2.50              |
| $\alpha$ -Cubebene                     | 0.13             | 0.15             | 0.12              |
| Eugenol                                | 0.80             | 0.62             | 0.63              |
| $\alpha$ -Copaene                      | 0.12             | 0.24             | 0.16              |
| Methyl eugenolo                        | 1.91             | 1.55             | 1.73              |
| $\beta$ -Caryophyllene                 | 0.21             | 0.29             | 0.29              |
| Isoeugenol                             | 0.15             | 0.19             | 0.15              |
| Methyl isoeugenol                      | 0.20             | 0.35             | 0.15              |
| Myristicin                             | 62.80            | 69.29            | 70.50             |
| Elemicin                               | 0.78             | 1.14             | 0.75              |
| NI <sup>d</sup>                        | 0.14             | 0.16             | 0.15              |
| Myristic acid                          | 0.78             | 1.01             | 1.12              |
| NI <sup>d</sup>                        |                  |                  |                   |
| <b>Total (%)</b>                       | <b>99.98</b>     | <b>99.65</b>     | <b>99.64</b>      |
| <b>Total identified</b>                | <b>99.84</b>     | <b>98.49</b>     | <b>98.49</b>      |
| <b>Monoterpene hydrocar.</b>           | <b>23.49</b>     | <b>18.01</b>     | <b>16.165</b>     |
| <b>Oxygenated monoterpenes</b>         | <b>6.16</b>      | <b>4.56</b>      | <b>5.24</b>       |
| <b>Sesquiterpene hydrocar.</b>         | <b>0.46</b>      | <b>0.67</b>      | <b>0.56</b>       |
| <b>Phenols</b>                         | <b>68.95</b>     | <b>75.23</b>     | <b>76.41</b>      |
| <b>Acids</b>                           | <b>0.78</b>      | <b>1.01</b>      | <b>1.12</b>       |





**Table S4.** Composition of the essential oils of *Myristica fragrans* obtained by using IL 2.<sup>a</sup>

| <b>Component<sup>b,c</sup></b>         | <b>Exp. n° 1</b> | <b>Exp. n° 5</b> | <b>Exp. n° 2</b> |
|----------------------------------------|------------------|------------------|------------------|
| $\alpha$ -Thujene                      | 0.30             | 0.39             | 0.28             |
| $\alpha$ -Pinene                       | 2.40             | 2.72             | 3.26             |
| Sabinene                               | 7.11             | 7.03             |                  |
| $\beta$ -Pinene                        | 2.31             | 2.14             | 7.88             |
| Myrcene                                | 0.56             | 0.67             | 3.42             |
| $\alpha$ -Phellandrene                 |                  |                  | 0.67             |
| $\alpha$ -Terpinene                    | 0.98             | 1.21             |                  |
| <i>p</i> -Cymene                       | 0.55             | 0.70             | 0.87             |
| Limonene                               | 1.82             | 1.97             | 0.94             |
| $\gamma$ -Terpinene                    | 1.31             | 1.40             | 3.31             |
| <i>cis</i> -Sabinene hydrate           |                  |                  | 2.45             |
| Terpinolene                            | 0.42             | 0.59             |                  |
| Linalool                               | 0.40             | 0.55             | 0.37             |
| <i>p</i> -Menth-2-en-1-ol <i>cis</i>   | 0.31             | 0.48             | 0.31             |
| <i>p</i> -Menth-2-en-1-ol <i>trans</i> |                  |                  | 0.36             |
| Terpinen-4-ol                          | 8.09             | 8.23             | 0.39             |
| $\alpha$ -Terpineol                    | 1.72             | 1.69             | 9.59             |
| <i>trans</i> -Piperitol                | 0.19             | 0.25             | 1.21             |
| Bornyl acetate                         | 0.14             | 0.15             | 0.19             |
| Safrole                                | 3.20             | 3.83             | 3.78             |
| $\alpha$ -Cubebene                     | 0.46             | 0.38             | 0.69             |
| Eugenol                                | 1.56             | 2.41             | 1.60             |
| $\alpha$ -Copaene                      | 0.56             | 0.51             | 0.64             |
| Methyl eugenolo                        | 3.54             | 5.86             | 4.45             |
| $\beta$ -Caryophyllene                 | 0.56             | 0.57             | 0.28             |
| Isoeugenol                             | 0.31             | 0.45             | 0.22             |
| Methyl isoeugenol                      | 1.42             | 1.23             | 1.01             |
| Myristicin                             | 53.12            | 48.82            | 48.24            |
| Elemicin                               | 0.42             | 1.47             | 1.39             |
| NI <sup>d</sup>                        | 0.10             | 0.21             | 0.10             |
| Myristic acid                          | 3.14             | 3.76             | 1.88             |
| NI <sup>d</sup>                        | 0.42             | 0.16             |                  |
| <b>Total (%)</b>                       | <b>97.42</b>     | <b>99.81</b>     | <b>99.76</b>     |
| <b>Total identified</b>                | <b>97.01</b>     | <b>99.44</b>     | <b>99.72</b>     |
| <b>Monoterpene hydrocar.</b>           | <b>17.77</b>     | <b>18.81</b>     | <b>23.44</b>     |
| <b>Oxygenated monoterpenes</b>         | <b>10.85</b>     | <b>11.16</b>     | <b>12.05</b>     |
| <b>Sesquiterpene hydrocar.</b>         | <b>1.58</b>      | <b>1.46</b>      | <b>1.61</b>      |
| <b>Phenols</b>                         | <b>63.57</b>     | <b>64.07</b>     | <b>60.68</b>     |
| <b>Acids</b>                           | <b>3.14</b>      | <b>3.76</b>      | <b>1.88</b>      |

**Table S5.** Composition of the essential oils of *Myristica fragrans* obtained by using IL 3.<sup>a</sup>

| <b>Component<sup>b,c</sup></b>         | <b>Exp. n° 13</b> | <b>Exp. n° 14</b> | <b>Exp. n° 15</b> |
|----------------------------------------|-------------------|-------------------|-------------------|
| $\alpha$ -Thujene                      | 1.07              | 0.98              | 0.82              |
| $\alpha$ -Pinene                       | 7.10              | 7.02              | 5.90              |
| Sabinene                               | 13.01             | 13.13             | 13.50             |
| $\beta$ -Pinene                        | 1.80              | 2.86              | 3.22              |
| Myrcene                                | 1.16              | 0.62              | 0.78              |
| $\alpha$ -Phellandrene                 | 0.52              | 0.39              | 0.68              |
| $\alpha$ -Terpinene                    | 1.15              | 1.13              | 1.20              |
| <i>p</i> -Cymene                       | 0.90              | 0.69              | 0.92              |
| Limonene                               | 3.56              | 2.67              | 2.88              |
| $\gamma$ -Terpinene                    | 1.50              | 1.78              | 1.94              |
| <i>cis</i> -Sabinene hydrate           | 0.15              | 0.24              | 0.30              |
| Terpinolene                            | 0.71              | 0.47              | 0.39              |
| Linalool                               | 0.57              | 0.56              | 0.78              |
| <i>p</i> -Menth-2-en-1-ol <i>cis</i>   | 0.43              | 0.30              | 0.56              |
| <i>p</i> -Menth-2-en-1-ol <i>trans</i> | 0.29              | 0.19              | 0.20              |
| Terpinen-4-ol                          | 9.90              | 7.33              | 7.28              |
| $\alpha$ -Terpineol                    | 1.34              | 0.99              | 1.03              |
| <i>trans</i> -Piperitol                | 0.11              | 0.20              | 0.15              |
| Bornyl acetate                         | 0.10              |                   | 0.28              |
| Safrole                                | 2.99              | 2.50              | 2.41              |
| $\alpha$ -Cubebene                     | 0.36              | 0.18              | 0.29              |
| Eugenol                                | 1.48              | 1.33              | 1.78              |
| $\alpha$ -Copaene                      | 0.32              | 0.26              | 0.33              |
| Methyl eugenolo                        | 4.82              | 3.90              | 3.50              |
| $\beta$ -Caryophyllene                 | 0.14              | 0.12              | 0.20              |
| Isoeugenol                             | 1.05              | 0.94              | 0.77              |
| Methyl isoeugenol                      | 0.85              | 0.34              | 0.59              |
| Myristicin                             | 38.16             | 46.22             | 45.60             |
| Elemicin                               | 1.55              | 0.65              | 0.51              |
| NI <sup>d</sup>                        | 0.34              | 0.22              | 0.15              |
| Myristic acid                          | 2.21              | 1.43              | 0.29              |
| NI <sup>d</sup>                        | 0.13              | 0.32              |                   |
| <b>Total (%)</b>                       | <b>99.81</b>      | <b>99.96</b>      | <b>99.21</b>      |
| <b>Total identified</b>                | <b>99.34</b>      | <b>99.42</b>      | <b>99.06</b>      |
| <b>Monoterpene hydrocar.</b>           | <b>32.63</b>      | <b>31.98</b>      | <b>32.51</b>      |
| <b>Oxygenated monoterpenes</b>         | <b>12.78</b>      | <b>9.57</b>       | <b>10.28</b>      |
| <b>Sesquiterpene hydrocar.</b>         | <b>0.82</b>       | <b>0.56</b>       | <b>0.82</b>       |
| <b>Phenols</b>                         | <b>50.90</b>      | <b>55.88</b>      | <b>55.16</b>      |
| <b>Acids</b>                           | <b>2.21</b>       | <b>1.43</b>       | <b>0.29</b>       |

**Table S6.** Composition of the essential oils of *Myristica fragrans* obtained by using IL 4.<sup>a</sup>

| Component <sup>b,c</sup>               | Exp. n° 6    | Exp. n° 7    |
|----------------------------------------|--------------|--------------|
| $\alpha$ -Thujene                      | 0.72         | 0.54         |
| $\alpha$ -Pinene                       | 5.18         | 3.76         |
| Sabinene                               | 7.63         | 2.10         |
| $\beta$ -Pinene                        | 3.78         | 4.00         |
| Myrcene                                | 0.43         | 0.45         |
| $\alpha$ -Phellandrene                 | 0.19         | 0.59         |
| $\alpha$ -Terpinene                    | 0.20         | 2.38         |
| <i>p</i> -Cymene                       | 1.54         | 0.70         |
| Limonene                               | 2.59         | 2.68         |
| $\gamma$ -Terpinene                    | 2.62         | 3.67         |
| <i>cis</i> -Sabinene hydrate           |              |              |
| Terpinolene                            | 0.56         | 0.83         |
| Linalool                               | 0.27         | 0.26         |
| <i>p</i> -Menth-2-en-1-ol <i>cis</i>   | 1.25         | 0.12         |
| <i>p</i> -Menth-2-en-1-ol <i>trans</i> | 0.16         | 0.13         |
| Terpinen-4-ol                          | 12.27        | 14.39        |
| $\alpha$ -Terpineol                    | 1.20         | 1.15         |
| <i>trans</i> -Piperitol                | 0.16         | 0.64         |
| Bornyl acetate                         |              |              |
| Safrole                                | 1.55         | 2.51         |
| $\alpha$ -Cubebene                     | 0.15         | 0.15         |
| Eugenol                                | 0.90         | 1.36         |
| $\alpha$ -Copaene                      | 0.25         | 0.22         |
| Methyl eugenolo                        | 3.41         | 3.55         |
| $\beta$ -Caryophyllene                 |              |              |
| Isoeugenol                             | 0.42         | 0.34         |
| Methyl isoeugenol                      | 0.54         |              |
| Myristicin                             | 47.38        | 46.51        |
| Elemicin                               | 1.47         | 2.11         |
| NI <sup>d</sup>                        | 0.13         | 0.43         |
| Myristic acid                          | 2.05         | 4.04         |
| NI <sup>d</sup>                        | 0.12         | 0.17         |
| <b>Total (%)</b>                       | <b>99.09</b> | <b>99.82</b> |
| <b>Total identified</b>                | <b>98.85</b> | <b>99.23</b> |
| <b>Monoterpene hydrocar.</b>           | <b>25.44</b> | <b>21.70</b> |
| <b>Oxygenated monoterpenes</b>         | <b>15.31</b> | <b>16.74</b> |
| <b>Sesquiterpene hydrocar.</b>         | <b>0.40</b>  | <b>0.46</b>  |
| <b>Phenols</b>                         | <b>55.65</b> | <b>56.38</b> |
| <b>Acids</b>                           | <b>2.05</b>  | <b>4.04</b>  |

**Table S7.** Composition of the essential oils of *Myristica fragrans* obtained by using IL 5.<sup>a</sup>

| Component <sup>b,c</sup>               | Exp. n° 11   | Exp. n° 12   |
|----------------------------------------|--------------|--------------|
| $\alpha$ -Thujene                      | 0.18         | 0.11         |
| $\alpha$ -Pinene                       | 1.35         | 1.18         |
| Sabinene                               | 2.33         | 1.42         |
| $\beta$ -Pinene                        | 1.86         | 1.65         |
| Myrcene                                | 0.33         | 0.37         |
| $\alpha$ -Phellandrene                 | 0.30         | 0.40         |
| $\alpha$ -Terpinene                    | 2.03         | 3.22         |
| <i>p</i> -Cymene                       | 0.61         | 1.04         |
| Limonene                               | 2.43         | 3.11         |
| $\gamma$ -Terpinene                    | 3.74         | 5.01         |
| <i>cis</i> -Sabinene hydrate           |              | 1.77         |
| Terpinolene                            | 1.00         | 0.14         |
| Linalool                               | 0.24         |              |
| <i>p</i> -Menth-2-en-1-ol <i>cis</i>   |              |              |
| <i>p</i> -Menth-2-en-1-ol <i>trans</i> |              |              |
| Terpinen-4-ol                          | 19.76        | 19.57        |
| $\alpha$ -Terpineol                    | 2.47         | 4.91         |
| <i>trans</i> -Piperitol                | 0.45         |              |
| Bornyl acetate                         | 0.60         | 2.44         |
| Safrole                                | 2.70         | 1.66         |
| $\alpha$ -Cubebene                     | 0.19         | 0.17         |
| Eugenol                                | 1.30         | 0.91         |
| $\alpha$ -Copaene                      | 0.22         | 0.30         |
| Methyl eugenolo                        | 3.53         | 3.51         |
| $\beta$ -Caryophyllene                 | 1.18         | 1.37         |
| Isoeugenol                             | 0.51         | 0.20         |
| Methyl isoeugenol                      |              | 0.53         |
| Myristicin                             | 44.11        | 40.20        |
| Elemicin                               | 1.85         | 1.60         |
| NI <sup>d</sup>                        | 0.33         | 0.37         |
| Myristic acid                          | 4.02         | 2.00         |
| NI <sup>d</sup>                        |              | 0.55         |
| <b>Total (%)</b>                       | <b>99.59</b> | <b>99.68</b> |
| <b>Total identified</b>                | <b>99.26</b> | <b>98.76</b> |
| <b>Monoterpene hydrocar.</b>           | <b>16.13</b> | <b>19.40</b> |
| <b>Oxygenated monoterpenes</b>         | <b>23.52</b> | <b>26.92</b> |
| <b>Sesquiterpene hydrocar.</b>         | <b>1.58</b>  | <b>1.84</b>  |
| <b>Phenols</b>                         | <b>54.01</b> | <b>48.61</b> |
| <b>Acids</b>                           | <b>4.02</b>  | <b>2.00</b>  |

**Table S8.** Composition of the essential oils of *Myristica fragrans* obtained by using IL 6.<sup>a</sup>

| <b>Component<sup>b,c</sup></b>         | <b>Exp. n° 3</b> | <b>Exp. n° 4</b> |
|----------------------------------------|------------------|------------------|
| $\alpha$ -Thujene                      |                  |                  |
| $\alpha$ -Pinene                       | 0.74             | 1.26             |
| Sabinene                               | 0.55             | 0.45             |
| $\beta$ -Pinene                        | 1.26             | 1.55             |
| Myrcene                                | 0.19             | 0.30             |
| $\alpha$ -Phellandrene                 | 0.39             | 0.54             |
| $\alpha$ -Terpinene                    | 2.06             | 2.71             |
| <i>p</i> -Cymene                       | 0.51             | 0.56             |
| Limonene                               | 2.19             | 2.42             |
| $\gamma$ -Terpinene                    | 3.99             | 4.59             |
| <i>cis</i> -Sabinene hydrate           |                  |                  |
| Terpinolene                            | 1.20             | 1.41             |
| Linalool                               |                  | 0.20             |
| <i>p</i> -Menth-2-en-1-ol <i>cis</i>   |                  |                  |
| <i>p</i> -Menth-2-en-1-ol <i>trans</i> |                  |                  |
| Terpinen-4-ol                          | 23.20            | 19.12            |
| $\alpha$ -Terpineol                    | 4.40             | 4.26             |
| <i>trans</i> -Piperitol                |                  |                  |
| Bornyl acetate                         | 2.11             | 2.04             |
| Safrole                                | 3.25             | 2.56             |
| $\alpha$ -Cubebene                     | 0.17             | 0.13             |
| Eugenol                                | 0.90             | 1.00             |
| $\alpha$ -Copaene                      | 0.25             | 0.17             |
| Methyl eugenolo                        | 2.81             | 3.20             |
| $\beta$ -Caryophyllene                 |                  | 1.53             |
| Isoeugenol                             |                  | 0.14             |
| Methyl isoeugenol                      | 1.13             | 1.24             |
| Myristicin                             | 45.30            | 42.54            |
| Elemicin                               | 1.35             | 1.47             |
| NI <sup>d</sup>                        |                  | 0.27             |
| Myristic acid                          | 1.59             | 2.67             |
| NI <sup>d</sup>                        |                  |                  |
| <b>Total (%)</b>                       | <b>99.94</b>     | <b>98.31</b>     |
| <b>Total identified</b>                | <b>99.94</b>     | <b>98.05</b>     |
| <b>Monoterpene hydrocar.</b>           | <b>13.07</b>     | <b>15.78</b>     |
| <b>Oxygenated monoterpenes</b>         | <b>30.11</b>     | <b>25.62</b>     |
| <b>Sesquiterpene hydrocar.</b>         | <b>0.42</b>      | <b>1.83</b>      |
| <b>Phenols</b>                         | <b>54.74</b>     | <b>52.14</b>     |
| <b>Acids</b>                           | <b>1.59</b>      | <b>2.67</b>      |

**Table S9.** *P*-values for all the coefficients

| PhenylProp                  | Coeff. SC        | Std. Err.        | P                | Conf. int(±)        |
|-----------------------------|------------------|------------------|------------------|---------------------|
| <b>Constant</b>             | 59,1907          | 0,572765         | 8,58677e-14      | 1,3208              |
| <b>cation</b>               | DF = 2           |                  |                  |                     |
| <b>cat(Me)</b>              | 8,10179          | 0,680818         | 2,28486e-06      | 1,56997             |
| <b>cat(Bu)</b>              | -4,6353          | 0,689342         | 0,000148943      | 1,58962             |
| <b>cat(EtOH)</b>            | -3,46649         | 0,703149         | 0,00114951       | 1,62146             |
| <b>anion</b>                | DF = 1           |                  |                  |                     |
| <b>ani(PO4)</b>             | -1,23141         | 0,601773         | <b>0,0749363</b> | 1,38769             |
| <b>ani(Cl)</b>              | 1,23141          | 0,601773         | <b>0,0749363</b> | 1,38769             |
| <b>IL-M</b>                 | 0,208447         | 0,599789         | <b>0,737156</b>  | 1,38311             |
| <b>cation x anion</b>       | DF = 2           |                  |                  |                     |
| <b>cat(Me) x ani(PO4)</b>   | -3,35341         | 0,693404         | 0,00129444       | 1,59899             |
| <b>cat(Me) x ani(Cl)</b>    | 3,35341          | 0,693404         | 0,00129444       | 1,59899             |
| <b>cat(Bu) x ani(PO4)</b>   | 1,47396          | 0,687305         | <b>0,064319</b>  | 1,58492             |
| <b>cat(Bu) x ani(Cl)</b>    | -1,47396         | 0,687305         | <b>0,064319</b>  | 1,58492             |
| <b>cat(EtOH) x ani(PO4)</b> | 1,87945          | 0,738598         | 0,0344618        | 1,70321             |
| <b>cat(EtOH) x ani(Cl)</b>  | -1,87945         | 0,738598         | 0,0344618        | 1,70321             |
| <b>cat x IL-</b>            | DF = 2           |                  |                  |                     |
| <b>cat(Me)*IL-</b>          | 0,579732         | 0,665761         | <b>0,409242</b>  | 1,53524             |
| <b>cat(Bu)*IL-</b>          | -1,17732         | 0,651857         | <b>0,108537</b>  | 1,50318             |
| <b>cat(EtOH)*IL-</b>        | 0,597584         | 0,738941         | <b>0,44207</b>   | 1,704               |
| <b>ani*IL-</b>              | DF = 1           |                  |                  |                     |
| <b>ani(PO4)*IL-</b>         | -0,98695         | 0,584587         | <b>0,129833</b>  | 1,34806             |
| <b>ani(Cl)*IL-</b>          | 0,98695          | 0,584587         | <b>0,129833</b>  | 1,34806             |
| <b>Yield</b>                | <b>Coeff. SC</b> | <b>Std. Err.</b> | <b>P</b>         | <b>Conf. int(±)</b> |
| <b>Constant</b>             | 1,20131          | 0,00907023       | 1,18091e-14      | 0,0209159           |
| <b>cation</b>               | DF = 2           |                  |                  |                     |
| <b>cat(Me)</b>              | -0,100847        | 0,0107813        | 1,39443e-05      | 0,0248618           |
| <b>cat(Bu)</b>              | 0,0802443        | 0,0109163        | 7,98742e-05      | 0,0251731           |
| <b>cat(EtOH)</b>            | 0,020603         | 0,011135         | <b>0,101431</b>  | 0,0256772           |
| <b>ani</b>                  | DF = 1           |                  |                  |                     |
| <b>ani(PO4)</b>             | -0,0438468       | 0,0095296        | 0,00175289       | 0,0219753           |
| <b>ani(Cl)</b>              | 0,0438468        | 0,0095296        | 0,00175289       | 0,0219753           |
| <b>IL-M</b>                 | 0,0925136        | 0,00949818       | 1,03284e-05      | 0,0219028           |

|                             |            |            |                 |           |
|-----------------------------|------------|------------|-----------------|-----------|
| <b>cat x ani</b>            | DF = 2     |            |                 |           |
| <b>cat(Me) x ani(PO4)</b>   | -0,0289097 | 0,0109807  | 0,0300479       | 0,0253214 |
| <b>cat(Me) x ani(Cl)</b>    | 0,0289097  | 0,0109807  | 0,0300479       | 0,0253214 |
| <b>cat(Bu) x ani(PO4)</b>   | 0,0182545  | 0,0108841  | <b>0,132031</b> | 0,0250987 |
| <b>cat(Bu) x ani(Cl)</b>    | -0,0182545 | 0,0108841  | <b>0,132031</b> | 0,0250987 |
| <b>cat(EtOH) x ani(PO4)</b> | 0,0106553  | 0,0116963  | <b>0,388923</b> | 0,0269718 |
| <b>cat(EtOH) x ani(Cl)</b>  | -0,0106553 | 0,0116963  | <b>0,388923</b> | 0,0269718 |
| <b>cat x IL-</b>            | DF = 2     |            |                 |           |
| <b>cat(Me) x IL-</b>        | -0,0185567 | 0,0105429  | <b>0,116427</b> | 0,0243119 |
| <b>cat(Bu) x IL-</b>        | -0,0449436 | 0,0103227  | 0,00243267      | 0,0238042 |
| <b>cat(EtOH) x IL-</b>      | 0,0635002  | 0,0117018  | 0,000625904     | 0,0269843 |
| <b>ani x IL-</b>            | DF = 1     |            |                 |           |
| <b>ani(PO4) x IL-</b>       | 0,0316184  | 0,00925745 | 0,00914913      | 0,0213477 |
| <b>ani(Cl) x IL-</b>        | -0,0316184 | 0,00925745 | 0,00914913      | 0,0213477 |

1. Mary, L.; Rick, E.; María, T.; Ed, F., A retention index calculator simplifies identification of plant volatile organic compounds. *Phytochem. Anal* **2009**, 20, (5), 378-384.
2. Adams, R. P., *Identification of essential oil components by gas chromatography/mass spectrometry*. Allured Publishing Corporation: Carol Stream, 2007; p viii + 804 pp.
